# Supplementary material
Source: PubMed Central journal article supplement (PMC3308841)
Supplement: supp_M111.297283_jbc.M111.297283-1.pdf [file supp_M111.297283_jbc.M111.297283-1.pdf]

Supplementary Information for

Processing and translation initiation of non-long terminal repeat retrotransposons  
by hepatitis delta virus (HDV)-like self-cleaving ribozymes

Dana J. Ruminski<sup>1,4</sup>, Chiu-Ho T. Webb<sup>1,4</sup>, Nathan J. Riccitelli<sup>2</sup> and Andrej Lupták<sup>1-3\*</sup>

Departments of <sup>1</sup>Molecular Biology and Biochemistry, <sup>2</sup>Chemistry and <sup>3</sup>Pharmaceutical  
Sciences, University of California, Irvine, California, USA.

<sup>4</sup>These authors contributed equally to this work.

To whom correspondence should be addressed: Andrej Lupták, Department of Molecular  
Biology and Biochemistry, Department of Chemistry and Department of Pharmaceutical  
Sciences, University of California, Irvine, Irvine, CA, USA, Tel: (949) 824-9132; E-mail:  
aluptak@uci.edu

Supplementary Figures S1-3  
Supplementary Tables S1-3  
Supplementary Experimental Procedures

## Supplementary Experimental Procedures

### Constructs and primers for *in vitro* self-cleavage kinetics

*Drosophila melanogaster* (strain: W1118)

#### drz-Dmel-1-1 (R2)

Ribozyme construct:

5'aagcgctggcaacggcgaggagtaactatgactgtcttaaGGGGAGTCATGGGGTATTTGAGAGCAGAGG  
GGGAGTATTCTTCTGTAATTCGTAAGTCATATCATATGATGTGCGGAAGGGGAATTT  
TACTCTGTAACCTACAAGTCTCTCCTTTACTCAAGTCGACTCAAACCTCCTCGTGGT  
GGTCCCCGGTAATGCTAAACTTGTTTAGCAGCTAATTTGAGCGGCaaaactt

AL506: 5'TTCCCGCGAAATTAATACGACTCACTATAGGGAGAAGCGCTGGTCAACGGCGGG

AL507: 5'AAGTTTTGCCGCTCAAATTAGCTGCTA

AL508 (inhibitor): 5'GACTCCCCTAAGA

#### drz-Dmel-1-2 (R2)

Ribozyme construct:

5'ggcgagctgatcactgattgggggtgactgcgacagagtGGGGATCATGGGGTATTTGAGAGCAGAGGG  
GGAGTATTCTTCTGTAATTCGTAAGTCATATCATATGGTGTGCGGAAGGGGAATTT  
ACTCTGTAACCTACAAGTCTCTCCTTTACTCAAGTCGACTCAAACCTCCTCGTGGTG  
GTCCCCGGTAATGCTAAACTCGTTTAGCAGCTAATTTGAGCGGCaaaac

AL527: 5'TTCCCGCGAAATTAATACGACTCACTATAGGGAGGGCGAGCTGATCACTGATTGG

AL528: 5'GTTTTGCCGCTCAAATTAGCTGCTA

AL529 (inhibitor): 5'GATCCCCAACTCG

#### drz-Dmel-2-1 (Baggins)

Ribozyme construct:

5'gtttgtctccgattctccaattgtattattataatGGCCGCCATGACAGTAGGTATCACAAGGGGATCA  
ACGCGCCACCACTACTGGAAGTGCAACTACACTCTCCACGCGAGGGCGGCTGGGAA  
CAGGCTCTCAGTTAGGTCATGTCTCTGCTAAGAGTGCTGGCTAATCATAGTTGggct

AL512: 5'TTCCCGCGAAATTAATACGACTCACTATAGGGAGGTTTTGTCTCCGGATTCTCAA

AL565: 5'AGCCCAACTATGATTAGCCAGC

AL514 (inhibitor): 5'GGCGGCCATTAT

#### drz-Dmel-2-2 (Baggins)

Ribozyme construct:

5'cacgatctcaggatctcgcggttaacttaaaccaaaaaaGGCCGCCACGACAGTAGATATCACAAGGGG  
ATCAACGCGCCACCAACGGTGGTACGCGCCGTAATTGTGAAACACTACTGGACGTG

CAACTACACTCTCCACGCGAGGGCGGCTGGAAACAGGCTTTTAGTAAGGTCATGTA  
ACTGCTAAGAGTGCTGGCTAATCGTAGTTGggctgg

AL515: 5'TTCCCGCGAAATTAATACGACTCACTATAGGGAGCACGATATCTACGGATCTCG

AL516: 5'CCAGCCCAACTACGATTAGCCA

AL517 (inhibitor): 5'GGCGGCCTTTTT

*Drosophila simulans* (strain: (Matzkin) Isosancruz-19)

drz-Dsim-1 (R2)

Ribozyme construct:

5'agtaagcgcgggtcaacggcgggagtaactatgactctctGAGGGATCTGGGGTAATTGCGAGCAGAGGG  
GGAGTATTTTTCTGTAATTCGTAAGTCATATCATATGGTGTGCGGAAGGGGAATTTT  
ACTCTGTAACTCACAAGTCTCTCCTTTACTCAAGTCGACTCAAACCTCCTCGTGGTG  
GTCCCGGTAATGCTAAACTTGTTTAGCAGCTAATTTGAGCGGCaaaaactt

AL566: 5'TTCCCGCGAAATTAATACGACTCACTATAGGGAGAGTAAGCGCGGGTCAACGGCG

AL567: 5'AAGTTTTTGCCGCTCAAATTAGCTGCT

AL568 (inhibitor): 5'GATCCCTCAGAGAG

*Drosophila ananassae* (strain: (BGS) SB18.8C)

drz-Dana-1 (R2)

Ribozyme construct:

5'taagcgcgggtcaacggcgggagtaactatgactctctttGGAGAATATGGATTTGATTGTGCAGAGGGGG  
TGCTATACCGTAACTCGTAAGCCATGCAATCAGATCAAGTCGACTCAAACCTCCTC  
GTGGTATTCTCTGGGTGCCAGTATTTACTGGTAGCTGATTTGAGCGGCgaaag

AL581: 5'TTCCCGCGAAATTAATACGACTCACTATAGGGAGTAAGCGCGGGTCAACGGC

AL581: 5'CTTTCGCCGCTCAAATCAGCT

AL583 (inhibitor): 5'ATATTCTCAAAGAGA

*Drosophila sechellia* (strain: (BSC) 3529 line 15)

drz-Dsec-1 (R2)

Ribozyme construct:

5'agtaagcgcgggtcaacggcgggagtaactatgactcttaGGGGATCAGGGGTAATTGCGAGCAGAGGGG  
GAGTATTTTTCTGTAATTCGTAAGTCATATCATATGGTGTGCGGAAGGGGAATTTTA  
CTCTGTAACTCACAAGTCTCTCCTTTACTCAAGTCGACTCAAACCTCCTCGTGGTGG  
TCCCGGTAATGCTAAACTTGTTTAGCAGCTAATTTGAGCGGCaa

AL798: 5'TTCCCGCGAAATTAATACGACTCACTATAGGGAGAGTAAGCGCGGGTCAACGGC

AL799: 5'TTGCCGCTCAAATTAGCTGCTA



*Ascaris lumbricoides*

drz-Alum-1 (R4)

Ribozyme construct:

5'ggtagccaaatgcctcgtcatctaattagtgacgcgcagGGGGCCGGTGGGTTTACTCACTTCTGACCCA  
CCACCAACGGAACGAGGGAAAGCAGAGCTGGGGCCCTCTTCCGATTGGCATGGAAC  
CGACCTCCACGTGGTGGCCCTGGGCAACGGAATTCAAGAGAGGATTTAATCCTCTCT  
ATCATTTGCAAGATGGATGAGATCGAGGTATCCGGCAAACAGGTTCCAAGTgagc

AL1029:

5'TTCCCGCGAAATTAATACGACTCACTATAGGGAGGGTAGCCAAATGCCTCGTCATCTAATTAGTGAC  
GCGCATGGGGGCCGGTGGGTTTACTCACTTCT

AL1027:

5'CTCCCGGCCGGTTGTTAGCCTCCCCACAGAAGGTGGGGAGTTTCCAGGGTGCACCACGAGGAGGTC  
ACCGGCCACCGCACCCCTACCTAACCTAA

AL1000:

5'GCTCACTTGAACCTGTTTGCCGGATACCTCGATCTCATCCATCTTGCAAATGATAGAGAGGATTAA  
ATCCTCTCTTGAATTCCGTTGCCAGGGCCACC

AL1001 (inhibitor): 5'GCATGAGGGGCC

*Heliconius numata*

drz-Hnum-1 (putatively R1)

Ribozyme construct:

5'ttaatagggttctctatgttaacctagatttaagaaattGGGGTGCTATGTTCGGTTACCTCCTCGTGGGGCA  
CCCTGGGCAACGGGACGGGCAGCAGCATCACAGTCGTGGTGCTGCTGCTCGTCGCG  
GCTAATAAACCGACAcgcg

AL1047:

5'TTCCCGCGAAATTAATACGACTCACTATAGGGAGTTAATAGGGTTCTCTATGTAACTAGATTTAAG  
AAATTTGGGGTGCTATGTTCGGTTACCTCCTCG

AL1048:

5'CGCGTGTTCGGTTTATTAGCCGCGACGAGCAGCAGCACCACGACTGTGATGCTGCTGCCCGTCCCGTT  
GCCAGGGTGCCCCACGAGGAGGTAACCGACAT

AL1050 (inhibitor): 5'GCACCCCAAATTT

*Schistosoma mansoni*

drz-Sman-1 (putative RTE)

Ribozyme construct:

5'ggggcaccacagggatGGGAGGCGAAATCCGACTCACACGTCCTCGTCGTGCCTCCTGGAT  
CATGGGACTGATTCCATGACCTAACGTGGGCGGttaat

AL593:

5'TTCCCGCGAAATTAATACGACTCACTATAGGGGCACCACAGGGATGGGAGGCGAAATCCGACTCA

AL594:

5'ATTAACCGCCACGTTAGGTCATGGAATCAGTCCCATGATCCAGGAGGCACGACGAGGACGTGTGA  
GTCGGATTTGCTCC

AL595 (inhibitor): 5'GCCTCCCATCCCTG

*Anopheles gambiae*

drz-Agam-3-1 (R6Ag3)

Ribozyme construct:

5'aggtcaccgaaacaacgtgtgactaaggtaacctgtgtGCCCCGGCAAAGTCCGACCATCACCTCCTCGC  
GGTGCCGGGCGGGGTAGGAGTTCGTCCTTGGACAGGCTCTGAGCTAACGATGGCggca  
c

AL1126: 5'TTCCCGCGAAATTAATACGACTCACTATAGGGAGAGGTCACCGAAACAACGTTG

AL1127: 5'GTGCCGCCATCGCTAGCTCA

AL943 (inhibitor): 5'CCGGGCACAGC

*Aplysia californica*

drz-Acal-1 (RTE)

Ribozyme construct:

5'aatatgagggctgtgtgtattcaattgctgagacctgtGTTGCGCATGTCCTGCCAAAAAGACGAGGAGG  
ACAGGGATTTCAACCAACCCCTGTCCGGCCCAGTTTGGCGGGGCAAGTCATCCAGC  
ACCTCTCCGTGGTGCGCACTAGTAACCGCTTTCTTGCGGGCTAAGCTGGATGagat

AL1340:

5'TTCCCGCGAAATTAATACGACTCACTATAGGGAGAATATGAGGGTCTGTGTGTATTCAATTGCTGAG  
ACCTTGTGGTGCGCATGTCCTGCCAAAAAGACG

AL1341:

5'CCACGGAGAGGTGCTGGATGACTTGCCCCGCCAAACTGGGCCGGACAGGGGTTGGTTGAAATCCCT  
GTCTCCTCGTCTTTTTGGCAGGACATGCGCACC

AL1342:

5'ATTCATCCAGCTTAGCCCGCAAGAAAGCGGTTACTAGTGCGCACCACGGAGAGGTGCTGGATGACT  
TG

AL1343 (inhibitor): 5'CGCACCACAAGG

*Ciona intestinalis*

drz-Cint-1 (R2)

Ribozyme construct:

5'tagaggatccctaaacggcgaggagtaactatgactctcttGACTCTCTATGGTGGTTCGCCTTCTCGTGGCGA  
GAGTCGTAATTACCTCCGGCATAACTGCGAGCCCTCACAAAGGCTGGCAGGGACTGC  
GGGAGCGAAACCAAGAATCACCAcgcc

AL1344:

5'TTCCCGCGAAATTAATACGACTCACTATAGGGAGTAGAGGATCCCTAAACGGCGGGAGTAACTATG  
ACTCTCTGACTCTCTATGGTGGTTCGCCTTCTC

AL1345:

5'TGCCAGCCTTGTGAGGGCTCGCAGTTATGCCGGAGGTAATTACGACTCTCGCCACGAGAAGGCGACC  
ACCATAGAGAGTC

AL1346:

5'GGCGTGGTGATTCTTGGTTTCGCTCCCGCAGTCCCTGCCAGCCTTGTGAGGGCTCGCAGT

AL1347 (inhibitor): 5'GAGAGTCAAGAGA

### **Primers for translation experiments**

The primers listed below were used to amplify the wild-type ribozymes from genomic DNA. The constructs included a 300 bp leader sequence and a BamHI site downstream of the ribozyme.

#### drz-Dmel-1-2 (R2)

AL530: 5'TTCCCGCGAAATTAATACGACTCACTATAGGGAGGCCAGCAGGAGAGCACGT

AL1147: 5'TAGGGATCCGCGCCGCTCAAATTAGCTGCTAA

#### drz-Dsim-1 (R2)

AL937: 5'TTCCCGCGAAATTAATACGACTCACTATAGGGAGTTAGTTACTTGTTCCTGGATAGT

AL1145: 5'TAGGGATCCGCGCCGCTCAAATTAGCTGCTAA

#### drz-Dana-1 (R2)

AL938: 5'TTCCCGCGAAATTAATACGACTCACTATAGGGAGTTGTAAGTTGTTCCCGGATAGT

AL1146: 5'TAGGGATCCGCGCCGCTCAAATCAGCTACCAG

#### drz-Agam-3-1 (R6Ag3)

AL941: 5'TTCCCGCGAAATTAATACGACTCACTATAGGGAGCCACCACGTCGTGGCAAC

AL945: 5'AGTCGGTCTCGTCTTCGCCATCGTTAGCTCAGAGCC

To amplify the full length HCV IRES from a gifted plasmid, the following primers were used:

AL1199: 5'TTCCCGCGAAATTAATACGACTCACTATAGCTCCCCTGTGAGGAACTACTG

AL1200: 5'GGCGTCTCCATGAGGATCCTTTTTCTTTGAGG

The entire luciferase gene was amplified from plasmid DNA using the primers below:

AL1149: 5'GCGCTGGATGGATCCATGGAA

AL1148: 5'AACTTATCGATTTTACCACATTTGTAG

To construct inactive ribozymes containing a single C to U mutation, the following oligonucleotides were used in with the QuikChange mutagenesis kit from Stratagene:

#### drz-Dmel-1-2 (R2)

AL1201: 5'CTAAACTCGTTTAGCAGTTAATTTGAGCGGCGCGG  
AL1202: 5'CCGCGCCGCTCAAATTAAGTCTAAACGAGTTTAG

drz-Dsim-1 (R2)

AL1203: 5'CTAAACTTGTTTAGCAGTTAATTTGAGCGGCGCGG  
AL1204: 5'CCGCGCCGCTCAAATTAAGTCTAAACAAGTTTAG

drz-Dana-1 (R2)

AL1205: 5'CCAGTATTTACTGGTAGTTGATTTGAGCGGCGCGG  
AL1206: 5'CCGCGCCGCTCAAATCAACTACCAGTAAATACTGG

drz-Agam-3-1 (R6Ag3)

AL1207: 5'GGACAGGCTCTGAGTTAGCGATGGCAGCG  
AL1208: 5'CGCTGCCATCGCTAACTCAGAGCCTGTCC

**Primers for P1 extension DNA template preparation**

The leader sequence variants shown in Figure 2 were made with PCR amplification from the drz-Dmel-1-2 plasmid using the specific forward primers and the universal reverse primer listed below. The universal forward primer was then added on to the constructs upstream of the original specific forward primer.

Fig. 2b:

AL1250: 5'AGTAACTATGACTCTCTTAAGGGGGATCATGGGGTATTTGAGAGCAGAG

Fig. 2c:

AL1251: 5'AGTAACTATGACTCTCTTAGGGGATCATGGGGTATTTGAGAGCAGAGGGG

Fig. 2d:

AL1252: 5'AGTAACTATGACTCTCTTAAGGGGATCATGGGGTATTTGAGAGCAGAGGGG

Fig. 2e:

AL1253: 5'AGTAACTATGACTCTCTTCGGGGATCATGGGGTATTTGAGAGCAGAGGGG

Fig. 2f:

AL1254: 5'AGTAACTATGACTCTCTCCGGGGATCATGGGGTATTTGAGAGCAGAGGGG

Fig. 2g:

AL1336: 5'AGTAACTATGACTCTCACCGGGGATCATGGGGTATTTGAGAGCAGAGGGG

Universal reverse:

AL1248: 5'GCGTCTTCATGGATCCGCGCCGCTCAAATTAGCTGCTAAAC

Universal forward:

AL1247:  
5'TTCCCGCAAATTAATACGACTCACTATAGGGAGAAATTCAAGTAAGCGCTGGTCAACGGCGGGAG  
TAACTATG



### **Transfection qPCR**

The nucleic acid content of the transfected S2 cell lysates was analyzed *via* phenol-chloroform extraction followed by quantitative RT-PCR using the primers listed below. The MiniOpticon Real-Time PCR Detection System (Bio-Rad Laboratories, Inc.) was used to perform and monitor the reactions for 45 cycles. Maxima® SYBR Green/Fluorescein qPCR Master Mix (Fermentas) was combined with diluted cDNA or isolated DNA (no RT reaction) and 0.5 µM primer mixtures in each reaction.

AL1646: 5'TTGGAGCACGGAAAGACGATGA

AL1647: 5'ATCTTTCCGCCCTTCTTGGCCT

### **Negative control for translation assays**

An inhibitory DNA oligonucleotide (shown below) was used to block translation of the drz-Dsim-1 luciferase construct as a negative control. The oligonucleotide was introduced into both *in vitro* and *in vivo* translation assays at two times the number of moles of RNA. After two 5 minute incubations at 55 °C and then 65 °C, the DNA-RNA mixture cooled on ice and used in the *in vitro* translation reaction and transfection assay as described in the main text.

AL1379: 5'GCGTCTCCATGGATCCGC

**Supplementary Table S1. Kinetic analysis of retrotransposon-associated ribozymes.**

10 mM Mg<sup>2+</sup>, 37°C

| Ribozyme     | Fast Rate Constant (1/hr <sup>-1</sup> ) | Amplitude     | Slow Rate Constant (1/hr <sup>-1</sup> ) | Amplitude   | Fraction Uncleaved |
|--------------|------------------------------------------|---------------|------------------------------------------|-------------|--------------------|
| drz-Dmel-1-1 | 37 ± 2                                   | 0.42 ± 0.08   | 1.4 ± 0.1                                | 0.33 ± 0.05 | 0.21 ± 0.09        |
| drz-Dmel-1-2 | 0.37 ± 0.03                              | 0.82 ± 0.08   | —                                        | —           | 0.10 ± 0.06        |
| drz-Dsec-1   | 90 ± 6                                   | 0.49 ± 0.13   | 3.1 ± 1.1                                | 0.25 ± 0.02 | 0.24 ± 0.14        |
| drz-Dsim-1   | 16 ± 9                                   | 0.49 ± 0.16   | 0.020 ± 0.016                            | 0.33 ± 0.26 | 0.13 ± 0.13        |
| drz-Dana-1   | 169 ± 13                                 | 0.18 ± 0.02   | 0.59 ± 0.02                              | 0.11 ± 0.04 | 0.19 ± 0.01        |
| drz-Cint-1   | ND                                       | ND            | ND                                       | ND          | ND                 |
| drz-Dper-1   | 29 ± 9                                   | 0.12 ± 0.03   | 1.8 ± 0.7                                | 0.15 ± 0.02 | 0.72 ± 0.02        |
| drz-Alum-1   | ND                                       | ND            | ND                                       | ND          | ND                 |
| drz-Agam-3-1 | ND                                       | ND            | ND                                       | ND          | ND                 |
| drz-Dmel-2-1 | 0.07 ± 0.01                              | 0.67 ± 0.03   | —                                        | —           | 0.33 ± 0.03        |
| drz-Dmel-2-2 | 11 ± 2                                   | 0.25 ± 0.05   | 1.1 ± 0.3                                | 0.72 ± 0.01 | 0.04 ± 0.04        |
| drz-Dper-2   | ND                                       | ND            | ND                                       | ND          | ND                 |
| drz-Acal-1   | ND                                       | ND            | ND                                       | ND          | ND                 |
| drz-Pxut-1   | ND                                       | ND            | ND                                       | ND          | ND                 |
| drz-Hnum-1   | ND                                       | ND            | ND                                       | ND          | ND                 |
| drz-Leri-2   | 0.029 ± 0.007                            | 0.81 ± 0.13   | —                                        | —           | 0.21 ± 0.13        |
| drz-Lmen-1   | 0.54 ± 0.01                              | 0.690 ± 0.003 | —                                        | —           | 0.31 ± 0.01        |
| drz-Sman-1   | 0.063 ± 0.003                            | 0.79 ± 0.03   | —                                        | —           | 0.24 ± 0.04        |

1 mM Mg<sup>2+</sup>, 25°C

| Ribozyme     | Fast Rate Constant (1/hr <sup>-1</sup> ) | Amplitude   | Slow Rate Constant (1/hr <sup>-1</sup> ) | Amplitude   | Fraction Uncleaved |
|--------------|------------------------------------------|-------------|------------------------------------------|-------------|--------------------|
| drz-Dmel-1-1 | 6.0 ± 1.0                                | 0.16 ± 0.01 | 0.31 ± 0.17                              | 0.48 ± 0.11 | 0.35 ± 0.12        |
| drz-Dmel-1-2 | 0.074 ± 0.016                            | 0.34 ± 0.03 | —                                        | —           | 0.66 ± 0.03        |
| drz-Dsec-1   | 10 ± 1                                   | 0.50 ± 0.01 | 0.65 ± 0.11                              | 0.34 ± 0.02 | 0.16 ± 0.02        |
| drz-Dsim-1   | 0.58 ± 0.07                              | 0.58 ± 0.04 | —                                        | —           | 0.42 ± 0.06        |
| drz-Dana-1   | 57 ± 7                                   | 0.51 ± 0.02 | 3.5 ± 1.1                                | 0.26 ± 0.05 | 0.20 ± 0.02        |
| drz-Cint-1   | 101 ± 43                                 | 0.21 ± 0.09 | 0.86 ± 0.37                              | 0.24 ± 0.10 | 0.52 ± 0.09        |
| drz-Dper-1   | 1.6 ± 0.2                                | 0.22 ± 0.03 | —                                        | —           | 0.75 ± 0.03        |
| drz-Alum-1   | 1.1 ± 0.1                                | 0.38 ± 0.03 | 0.055 ± 0.040                            | 0.22 ± 0.02 | 0.40 ± 0.01        |
| drz-Agam-3-1 | 31 ± 6                                   | 0.30 ± 0.02 | 2.0 ± 0.1                                | 0.48 ± 0.01 | 0.22 ± 0.02        |
| drz-Dmel-2-1 | ND                                       | ND          | ND                                       | ND          | ND                 |
| drz-Dmel-2-2 | 0.055 ± 0.015                            | 0.60 ± 0.05 | —                                        | —           | 0.40 ± 0.05        |
| drz-Dper-2   | 13 ± 4                                   | 0.21 ± 0.04 | 0.21 ± 0.08                              | 0.31 ± 0.03 | 0.459 ± 0.001      |
| drz-Acal-1   | 0.25 ± 0.05                              | 0.54 ± 0.11 | —                                        | —           | 0.46 ± 0.12        |
| drz-Pxut-1   | 0.067 ± 0.001                            | 0.45 ± 0.01 | —                                        | —           | 0.53 ± 0.01        |
| drz-Hnum-1   | 63.0 ± 0.5                               | 0.45 ± 0.01 | 2.1 ± 0.92                               | 0.23 ± 0.01 | 0.33 ± 0.01        |
| drz-Leri-2   | ND                                       | ND          | ND                                       | ND          | ND                 |
| drz-Lmen-1   | ND                                       | ND          | ND                                       | ND          | ND                 |
| drz-Sman-1   | ND                                       | ND          | ND                                       | ND          | ND                 |

**Supplementary Table S2. Kinetic analysis of drz-Dmel-1-1 in different divalent ions.**

| Conditions                   | Fast Rate Constant (1/hr <sup>-1</sup> ) | Amplitude   | Slow Rate Constant (1/hr <sup>-1</sup> ) | Amplitude   | Fraction Uncleaved |
|------------------------------|------------------------------------------|-------------|------------------------------------------|-------------|--------------------|
| 1 mM Mg <sup>2+</sup> , 25°C | 6 ± 1                                    | 0.16 ± 0.01 | 0.31 ± 0.17                              | 0.48 ± 0.11 | 0.35 ± 0.12        |
| 1 mM Ca <sup>2+</sup> , 25°C | 13 ± 2                                   | 0.12 ± 0.01 | 0.49 ± 0.38                              | 0.21 ± 0.13 | 0.55 ± 0.12        |
| 1 mM Mn <sup>2+</sup> , 25°C | 8 ± 4                                    | 0.13 ± 0.03 | 0.85 ± 0.38                              | 0.47 ± 0.05 | 0.39 ± 0.01        |

**Supplementary Table S3. Kinetic analysis of drz-Dmel-1-1 leader sequence variants.**

| drz-Dmel-1-1 variant | Fast Rate Constant (1/hr <sup>-1</sup> ) | Amplitude   | Slow Rate Constant (1/hr <sup>-1</sup> ) | Amplitude   | Fraction Uncleaved |
|----------------------|------------------------------------------|-------------|------------------------------------------|-------------|--------------------|
| 2b                   | 19 ± 4                                   | 0.19 ± 0.08 | 0.35 ± 0.21                              | 0.24 ± 0.03 | 0.57 ± 0.05        |
| 2c                   | 90 ± 8                                   | 0.30 ± 0.19 | 0.83 ± 0.42                              | 0.20 ± 0.06 | 0.57 ± 0.05        |
| 2d                   | 86 ± 3                                   | 0.22 ± 0.07 | 1.15 ± 0.47                              | 0.14 ± 0.05 | 0.63 ± 0.07        |
| 2e                   | 0.36 ± 0.16                              | 0.20 ± 0.04 | —                                        | —           | 0.69 ± 0.03        |
| 2e*                  | 138 ± 40                                 | 0.19 ± 0.05 | 2.85 ± 0.66                              | 0.19 ± 0.07 | 0.58 ± 0.10        |
| 2f                   | 0.17 ± 0.05                              | 0.32 ± 0.05 | —                                        | —           | 0.62 ± 0.04        |
| 2g                   | 0.14 ± 0.01                              | 0.37 ± 0.01 | —                                        | —           | 0.62 ± 0.02        |

\*Faster self-cleavage is observed in a different preparation of RNA.

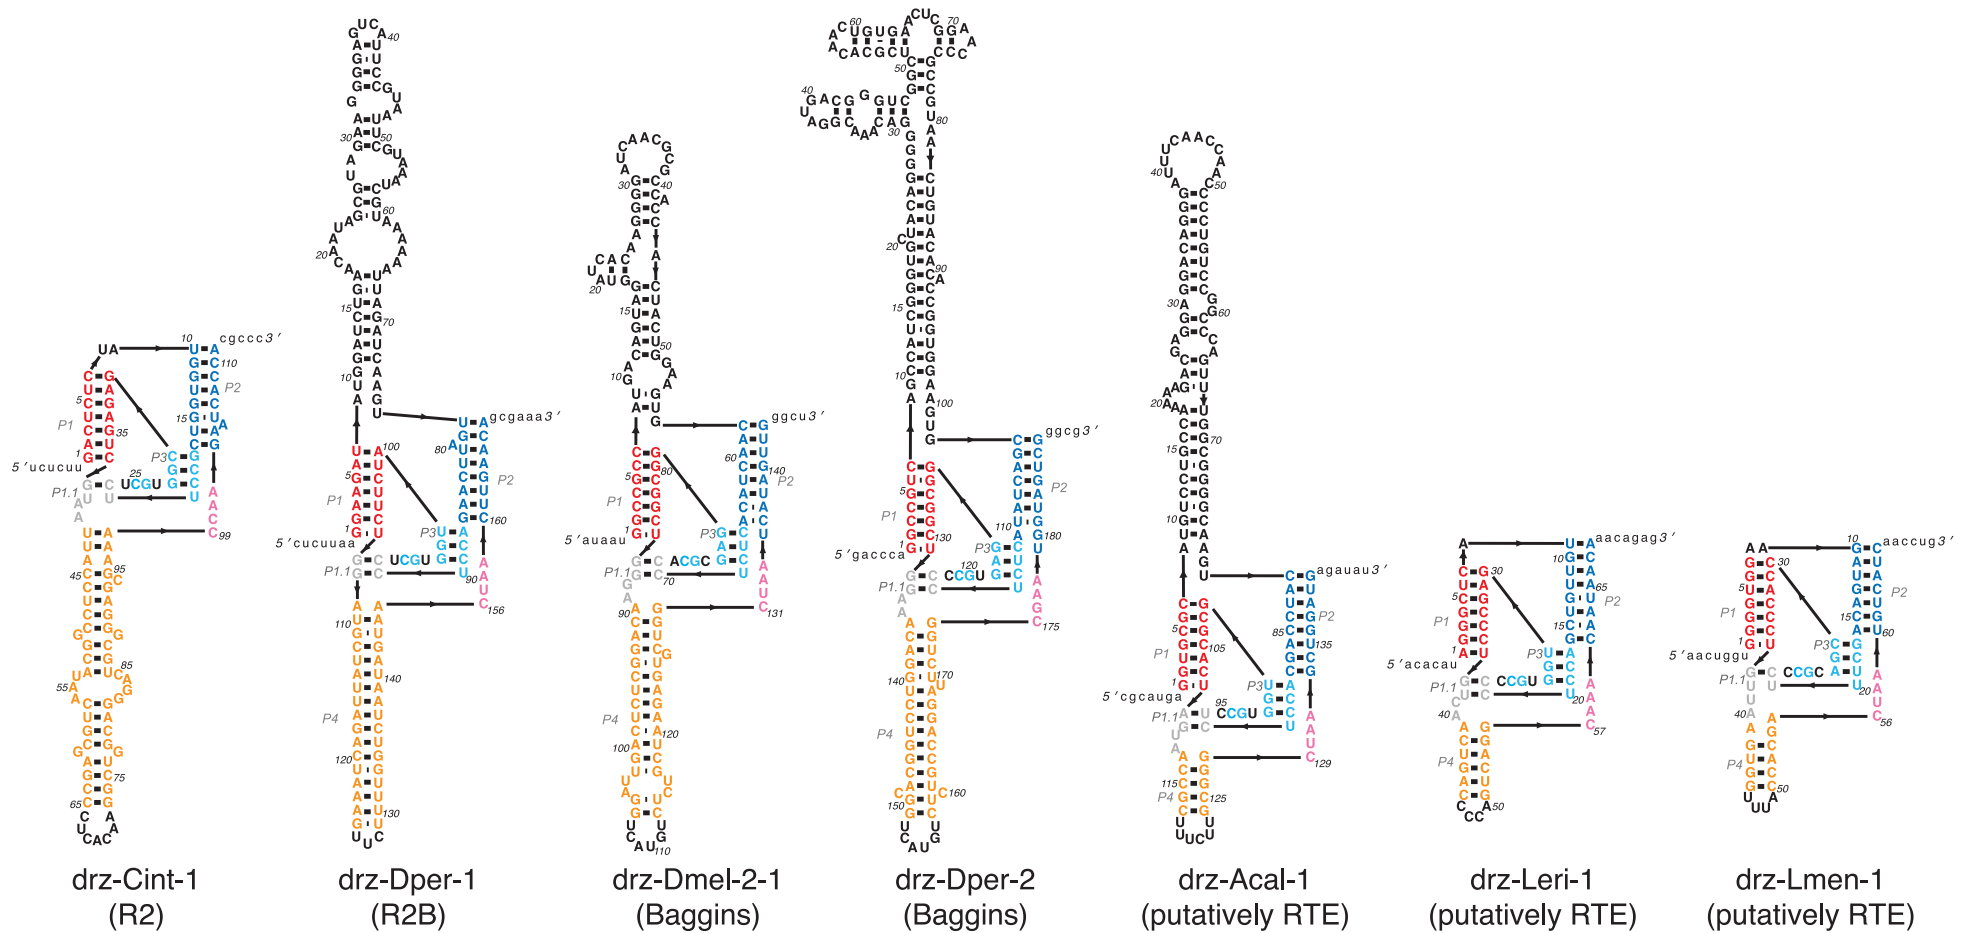

**Supplementary Figure S1. Secondary structures of other *in vitro* confirmed retrotransposon HDV-like ribozymes.** From left to right, these include the *C. intestinalis* R2 drz-Cint-1, the *D. persimilis* R2B drz-Dper-1, the *D. melanogaster* Baggins drz-Dmel-2-1, the *D. persimilis* Baggins drz-Dper-2, the *A. californica* RTE drz-Acal-1, the *L. erinacea* RTE (putative) drz-Leri-1, and the *L. menadoensis* RTE (putative) drz-Lmen-1. Core elements are colored by region corresponding to the HDV ribozyme (Ferre-D'Amare et al., 1998).

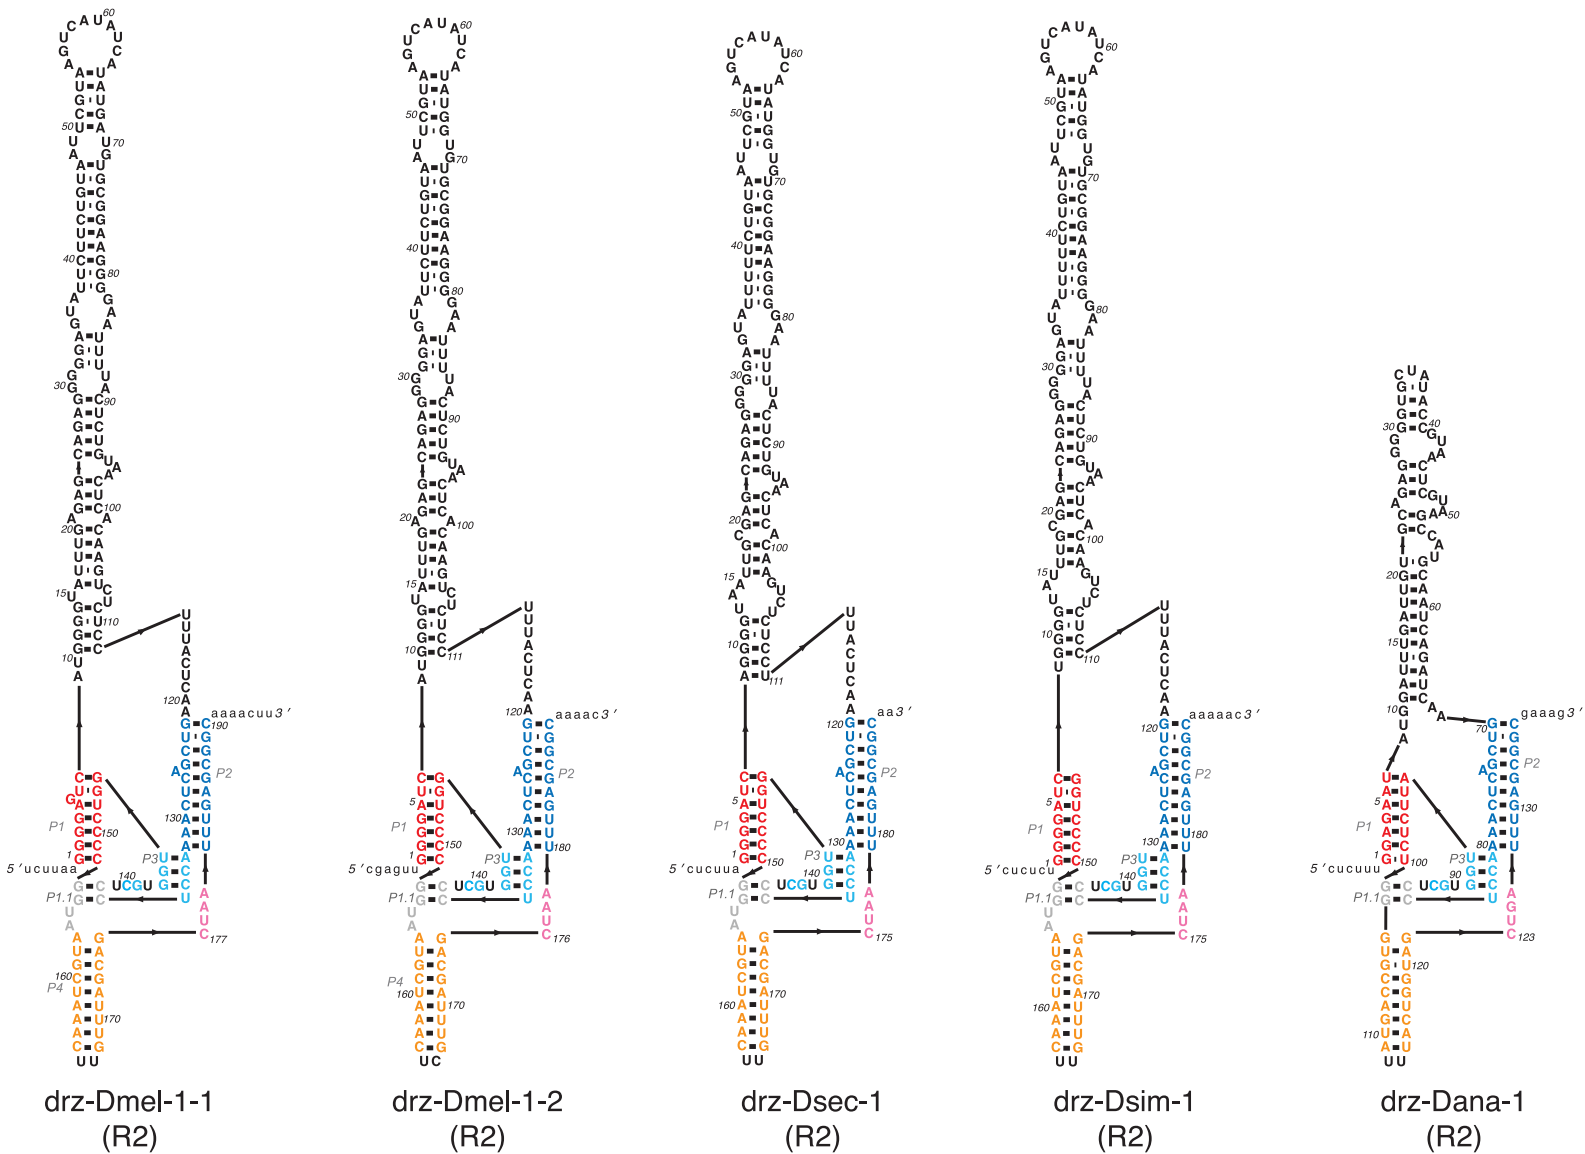

**Supplementary Figure S2. Secondary structures of the *in vitro* confirmed *Drosophila* R2 retrotransposon HDV-like ribozymes.** From left to right, these include the *D. melanogaster* R2 drz-Dmel-1-1, the *D. melanogaster* R2 drz-Dmel-1-2, the *D. sechellia* R2 drz-Dsec-1, the *D. simulans* R2 drz-Dsim-1, and the *D. ananassae* R2 drz-Dana-1. These RNAs were used for the consensus secondary structure in Figure 2. Core elements are colored by region corresponding to the HDV ribozyme (Ferre-D'Amare et al., 1998).

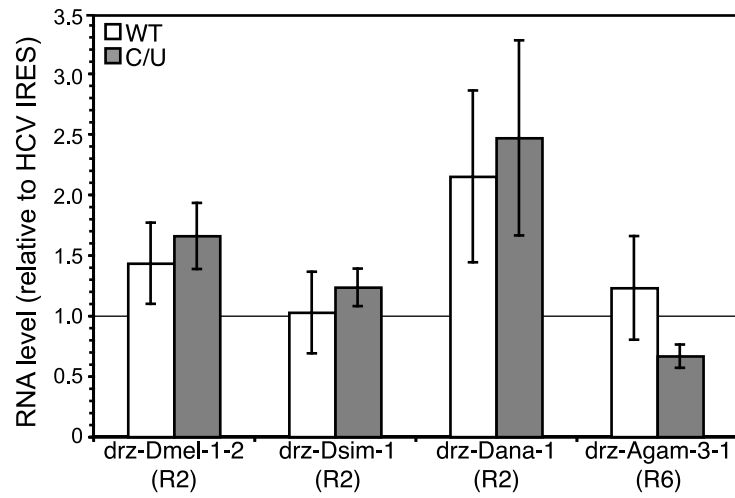

**Supplementary Figure S3. Level of ribozyme-terminated RNA relative to HCV IRES-terminated RNA.** Quantitative RT-PCR of the luciferase coding region was performed on S2 cell lysates 24 h post-transfection to measure RNA levels. Equal amounts of RNA were used for transfections. All data are average values  $\pm$  average deviations.
